# Supplementary material for: Hypothalamic AMP-Activated Protein Kinase Regulates Glucose Production
Source: PubMed Central journal article supplement — Diabetes. 2010 Aug 3;59(10):2435–43. doi: 10.2337/db10-0221 (PMC3279556; doi:10.2337/db10-0221), 2010-08-03
Supplement: supp_db10-0221_OnlineppendixDB10-0221.pdf [file supp_db10-0221_OnlineppendixDB10-0221.pdf]

Supplemental Figure 1

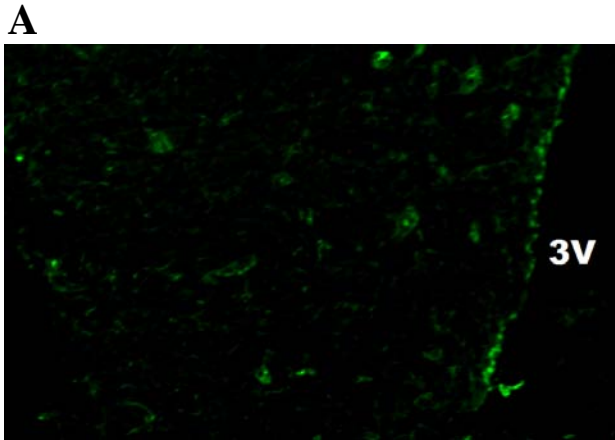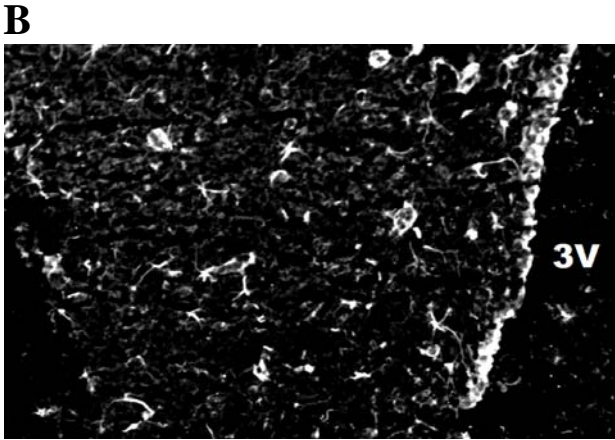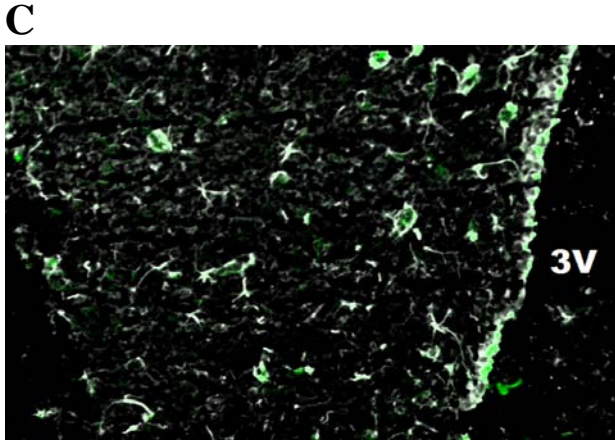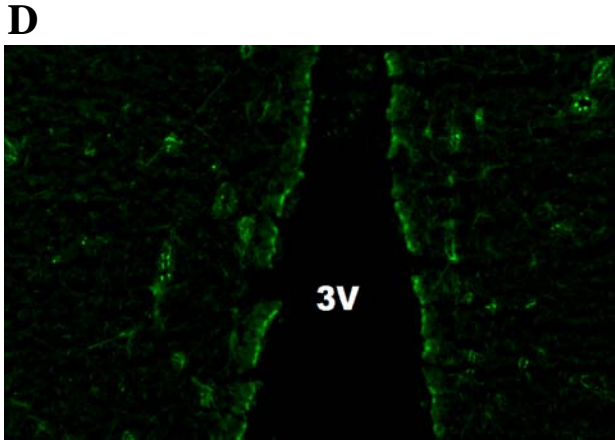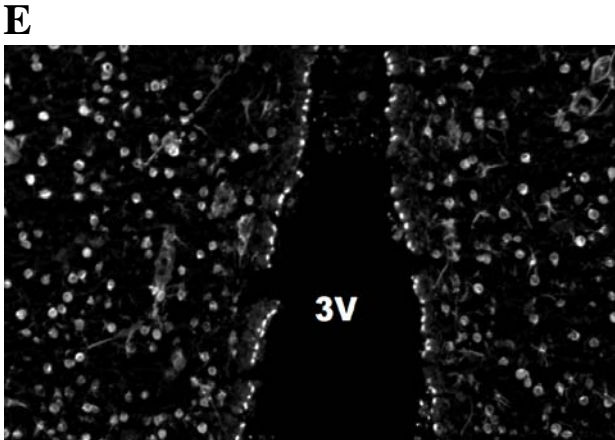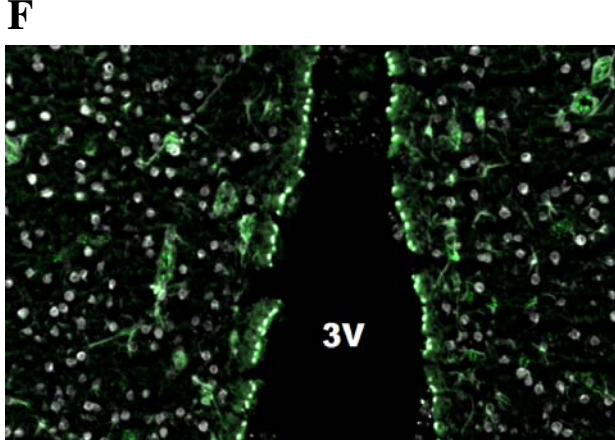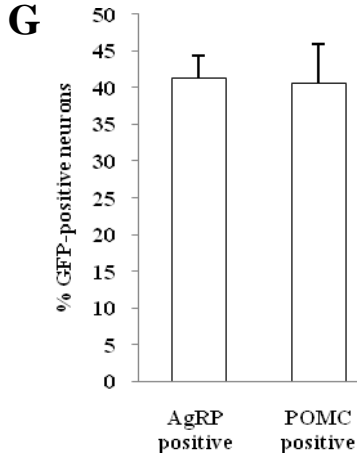

## Supplemental Figure Legend

**Figure 1. Co-localization of GFP with AgRP and POMC in the mediobasal hypothalamus of Ad- GFP injected rats. *A, D:***

Representative immunofluorescence images showing GFP expression (green) in the mediobasal hypothalamus. ***B, E:***

Immunofluorescence staining for AgRP and POMC (tinted white) respectively in the mediobasal hypothalamus. ***C and F:*** Merged

images (***A and B, D and E***) show that GFP is co-localized with AgRP-positive and POMC-positive neurons of the arcuate nucleus. ***G:***

Percentage of GFP-positive neurons that express AgRP or POMC (n=4 for each group). 3V, third ventricle.
